# Supplementary material for: Four New Polyprenylated Acylphloroglucinols from Hypericum perforatum L
Source: MDPI journal article supplement (doi:10.3390/molecules29081756), 2024-04-12

Five new Polycyclic Polyprenylated Acylphloroglucinols from *Hypericum perforatum* L.

Xiaoying Wang<sup>1†</sup>, Wuyang Liu<sup>1†</sup>, Sheng Chen<sup>1</sup>, Junmian Tian<sup>1,\*</sup>, Jinming Gao<sup>1,\*</sup>

<sup>1</sup> Shaanxi Key Laboratory of Natural Products & Chemical Biology, College of Chemistry & Pharmacy, Northwest A&F University, Yangling 712100, Shaanxi, People's Republic of China

\*Corresponding authors:

Junmian Tian – Tel: +86-29-87092335; Fax: +86-29-87092226; Email: tianjunmian@nwsuaf.edu.cn.

Jinming Gao – Tel: +86-29-87092335; Fax: +86-29-87092226; Email: jinminggao@nwsuaf.edu.cn.

## Contents

|                                                                                                       |    |
|-------------------------------------------------------------------------------------------------------|----|
| Figure S1. The $^1\text{H}$ NMR spectrum of Hyperforatum A (1) in $\text{CDCl}_3$ (400 MHz).....      | 3  |
| Figure S2. The $^{13}\text{C}$ NMR spectrum of Hyperforatum A (1) in $\text{CDCl}_3$ (100 MHz).....   | 3  |
| Figure S3. The DEPT 135° spectrum of Hyperforatum A (1) in $\text{CDCl}_3$ .....                      | 4  |
| Figure S4. The $^1\text{H}$ - $^1\text{H}$ COSY spectrum of Hyperforatum A (1).....                   | 4  |
| Figure S5. The HSQC spectrum of Hyperforatum A (1).....                                               | 5  |
| Figure S6. The HMBC spectrum of Hyperforatum A (1).....                                               | 5  |
| Figure S7. The NOESY spectrum of Hyperforatum A (1). ....                                             | 6  |
| Figure S8. The HRESIMS spectrum of Hyperforatum A (1). ....                                           | 6  |
| Figure S9. The UV spectrum of Hyperforatum A (1). ....                                                | 7  |
| Figure S10. The Experimental ECD spectrum of Hyperforatum A (1). ....                                 | 7  |
| Figure S11. The $^1\text{H}$ NMR spectrum of Hyperforatum B (2) in $\text{CDCl}_3$ (400 MHz). ....    | 8  |
| Figure S12. The $^{13}\text{C}$ NMR spectrum of Hyperforatum B (2) in $\text{CDCl}_3$ (100 MHz). .... | 8  |
| Figure S13. The DEPT 135° spectrum of Hyperforatum B (2) in $\text{CDCl}_3$ . ....                    | 9  |
| Figure S14. The $^1\text{H}$ - $^1\text{H}$ COSY spectrum of Hyperforatum B (2). ....                 | 9  |
| Figure S15. The HSQC spectrum of Hyperforatum B (2). ....                                             | 10 |
| Figure S16. The HMBC spectrum of Hyperforatum B (2). ....                                             | 10 |
| Figure S17. The NOESY spectrum of Hyperforatum B (2).....                                             | 11 |
| Figure S18. The HRESIMS spectrum of Hyperforatum B (2).....                                           | 11 |
| Figure S19. The UV spectrum of Hyperforatum B (2).....                                                | 12 |
| Figure S20. The Experimental ECD spectrum of Hyperforatum B (2).....                                  | 12 |
| Figure S21. The $^1\text{H}$ NMR spectrum of Hyperforatum C (3) in $\text{CDCl}_3$ (400 MHz).....     | 13 |
| Figure S22. The $^{13}\text{C}$ NMR spectrum of Hyperforatum C (3) in $\text{CDCl}_3$ (100 MHz).....  | 13 |
| Figure S23. The DEPT 135° spectrum of Hyperforatum C (3) in $\text{CDCl}_3$ .....                     | 14 |
| Figure S24. The $^1\text{H}$ - $^1\text{H}$ COSY spectrum of Hyperforatum C (3). ....                 | 14 |
| Figure S25. The HSQC spectrum of Hyperforatum C (3).....                                              | 15 |
| Figure S26. The HMBC spectrum of Hyperforatum C (3).....                                              | 15 |
| Figure S27. The NOESY spectrum of Hyperforatum C (3).....                                             | 16 |
| Figure S28. The HRESIMS spectrum of Hyperforatum C (3).....                                           | 16 |
| Figure S29. The UV spectrum of Hyperforatum C (3). ....                                               | 17 |
| Figure S30. The Experimental ECD spectrum of Hyperforatum C (3). ....                                 | 17 |
| Figure S31. The $^1\text{H}$ NMR spectrum of Hyperforatum D (4) in $\text{CDCl}_3$ (800 MHz). ....    | 18 |
| Figure S32. The $^{13}\text{C}$ NMR spectrum of Hyperforatum D (4) in $\text{CDCl}_3$ (200 MHz).....  | 18 |
| Figure S33. The DEPT 135° spectrum of Hyperforatum D (4) in $\text{CDCl}_3$ . ....                    | 19 |
| Figure S34. The $^1\text{H}$ - $^1\text{H}$ COSY spectrum of Hyperforatum D (4).....                  | 19 |
| Figure S35. The HSQC spectrum of Hyperforatum D (4).....                                              | 20 |
| Figure S36. The HMBC spectrum of Hyperforatum D (4).....                                              | 20 |
| Figure S37. The NOESY spectrum of Hyperforatum D (4). ....                                            | 21 |
| Figure S38. The HRESIMS spectrum of Hyperforatum D (4). ....                                          | 21 |
| Figure S39. The UV spectrum of Hyperforatum D (4).....                                                | 22 |
| Figure S40. The Experimental ECD spectrum of Hyperforatum D (4).....                                  | 22 |

**Figure S1.** The  $^1\text{H}$  NMR spectrum of Hyperforatum A (**1**) in  $\text{CDCl}_3$  (400 MHz).

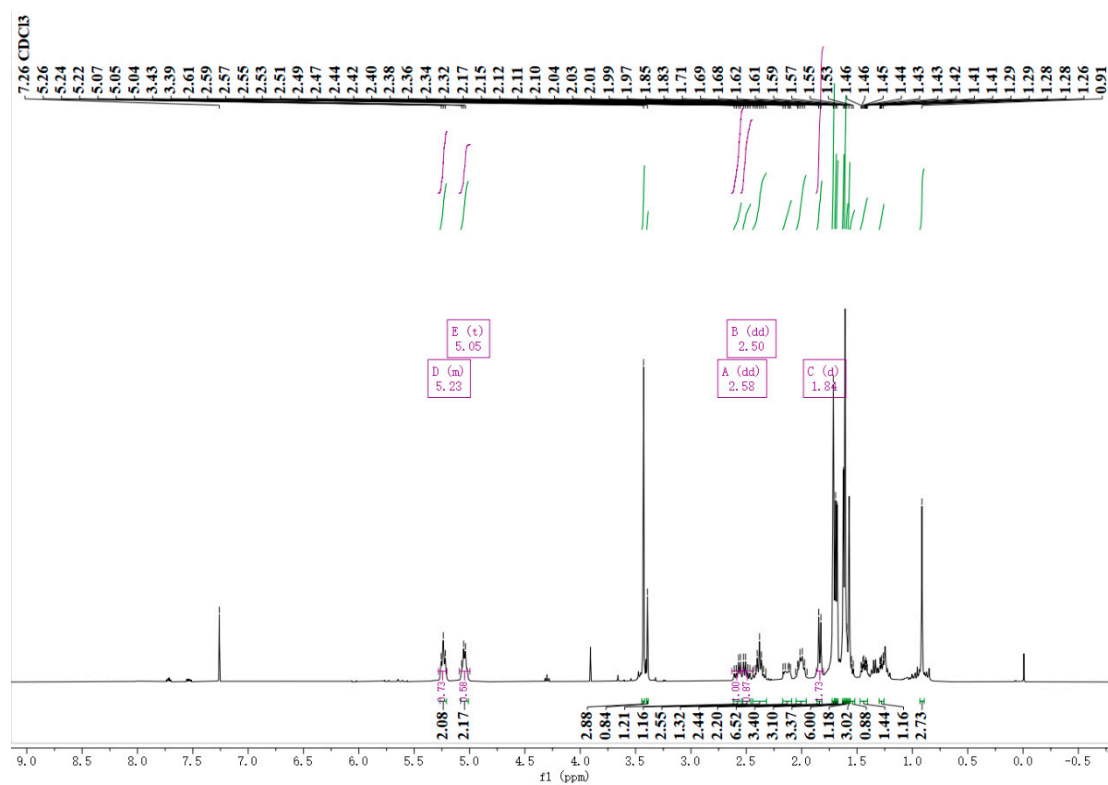

**Figure S2.** The  $^{13}\text{C}$  NMR spectrum of Hyperforatum A (**1**) in  $\text{CDCl}_3$  (100 MHz).

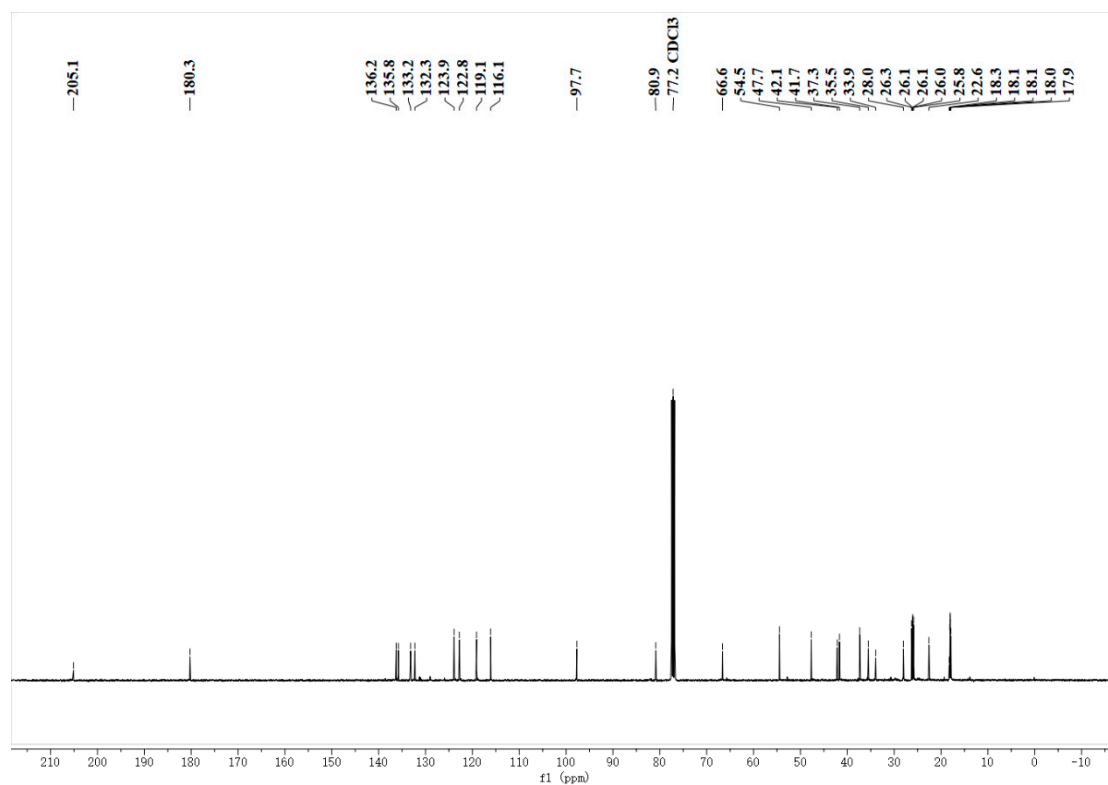

**Figure S3.** The DEPT 135° spectrum of Hyperforatum A (**1**) in CDCl<sub>3</sub>.

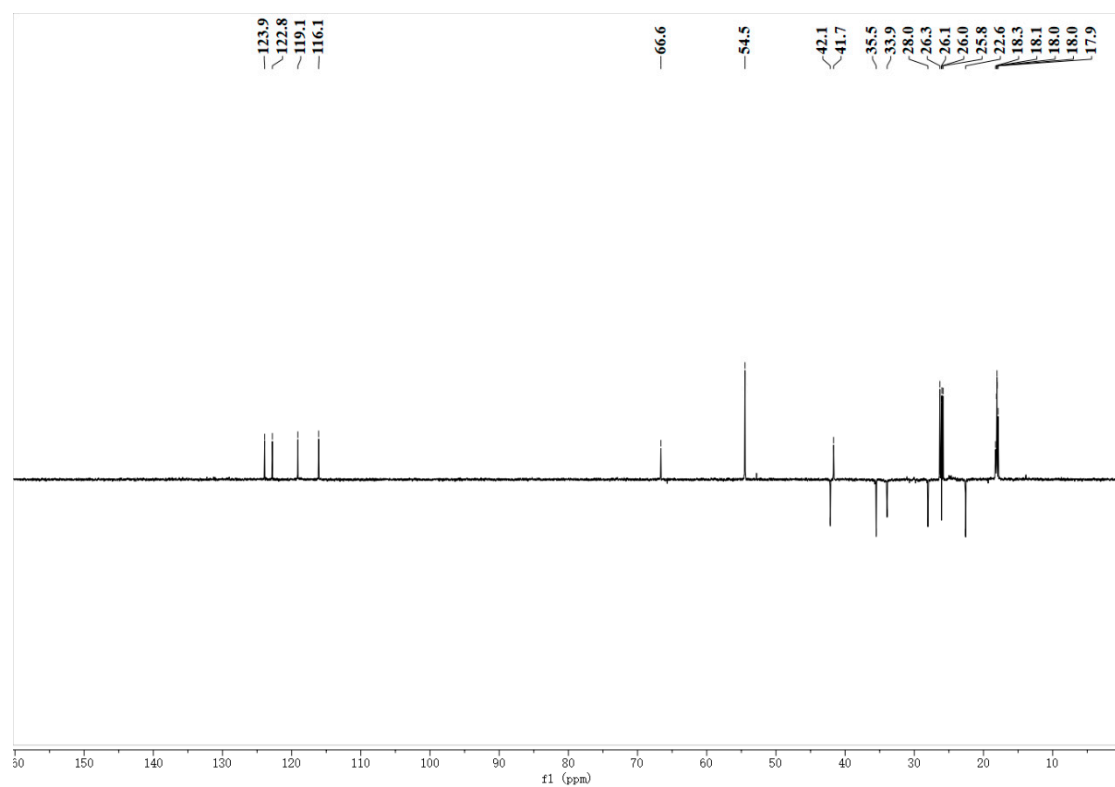

**Figure S4.** The <sup>1</sup>H-<sup>1</sup>H COSY spectrum of Hyperforatum A (**1**).

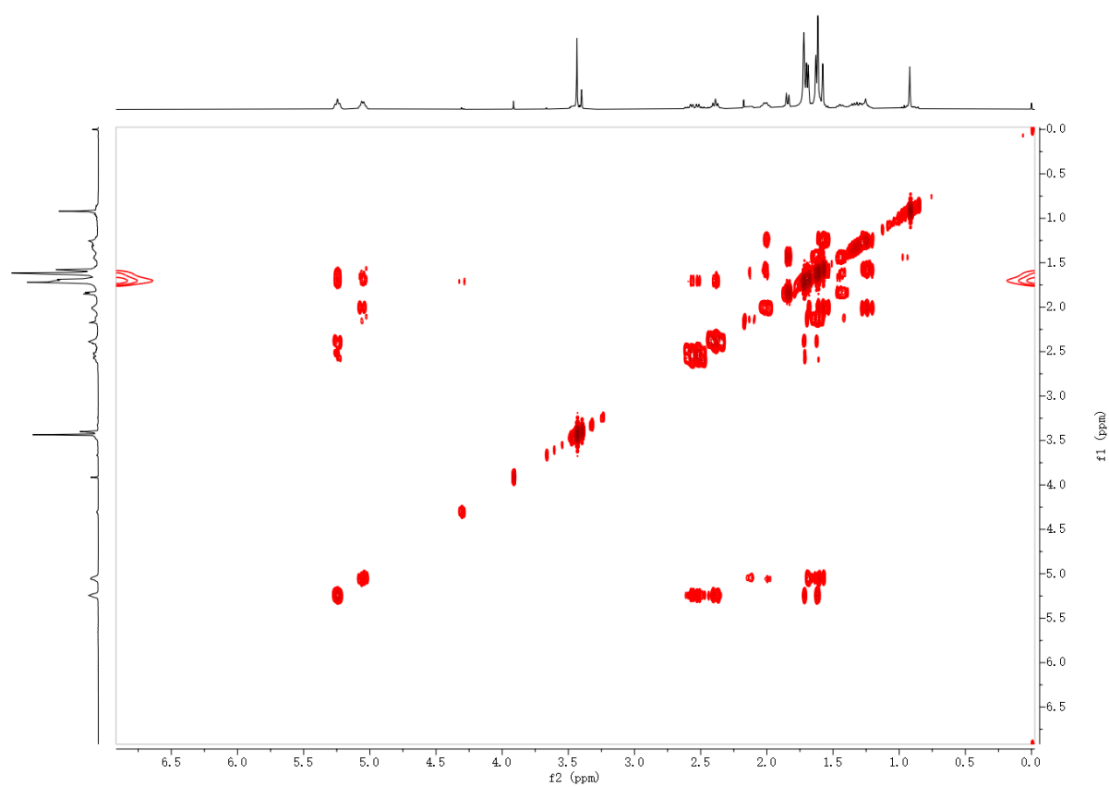

**Figure S5.** The HSQC spectrum of Hyperforatum A (**1**).

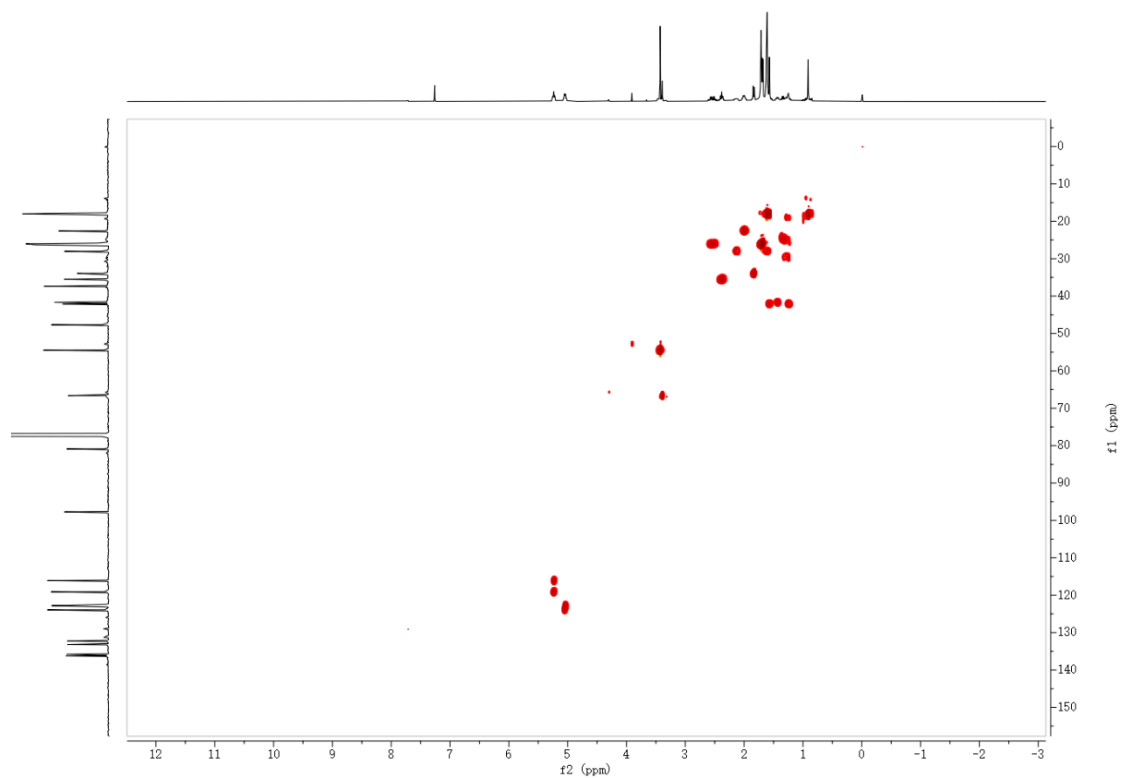

**Figure S6.** The HMBC spectrum of Hyperforatum A (**1**).

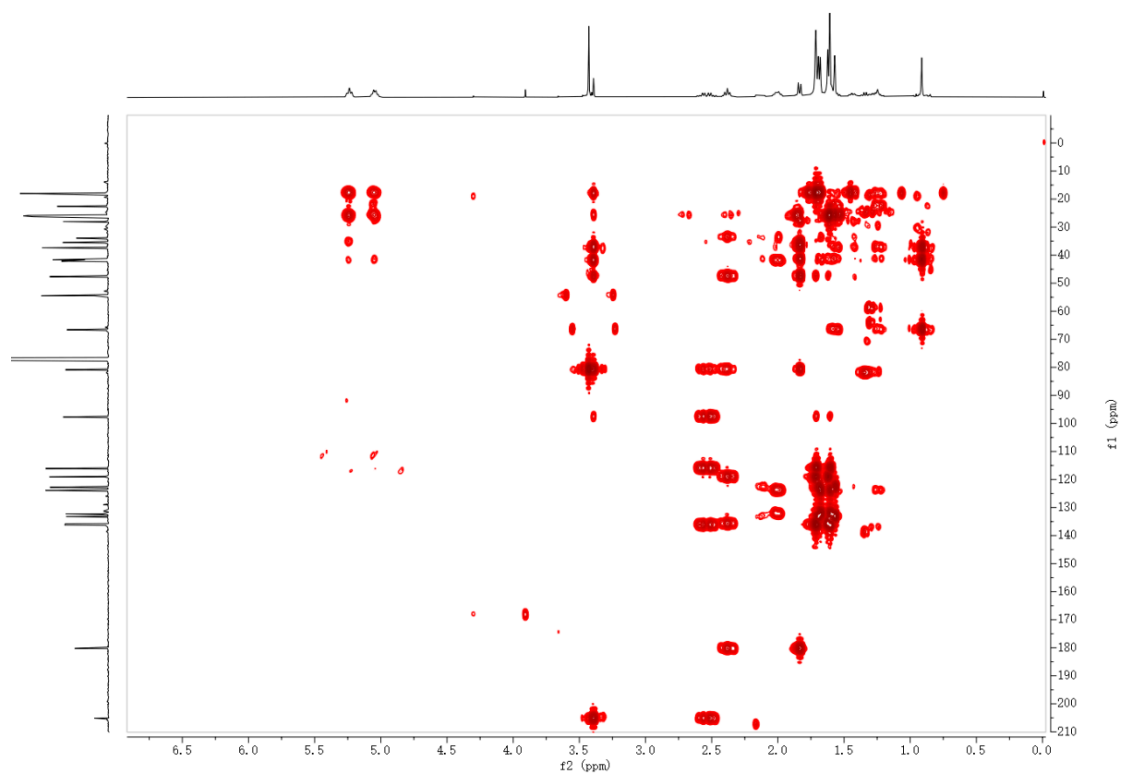

**Figure S7.** The NOESY spectrum of Hyperforatum A (**1**).

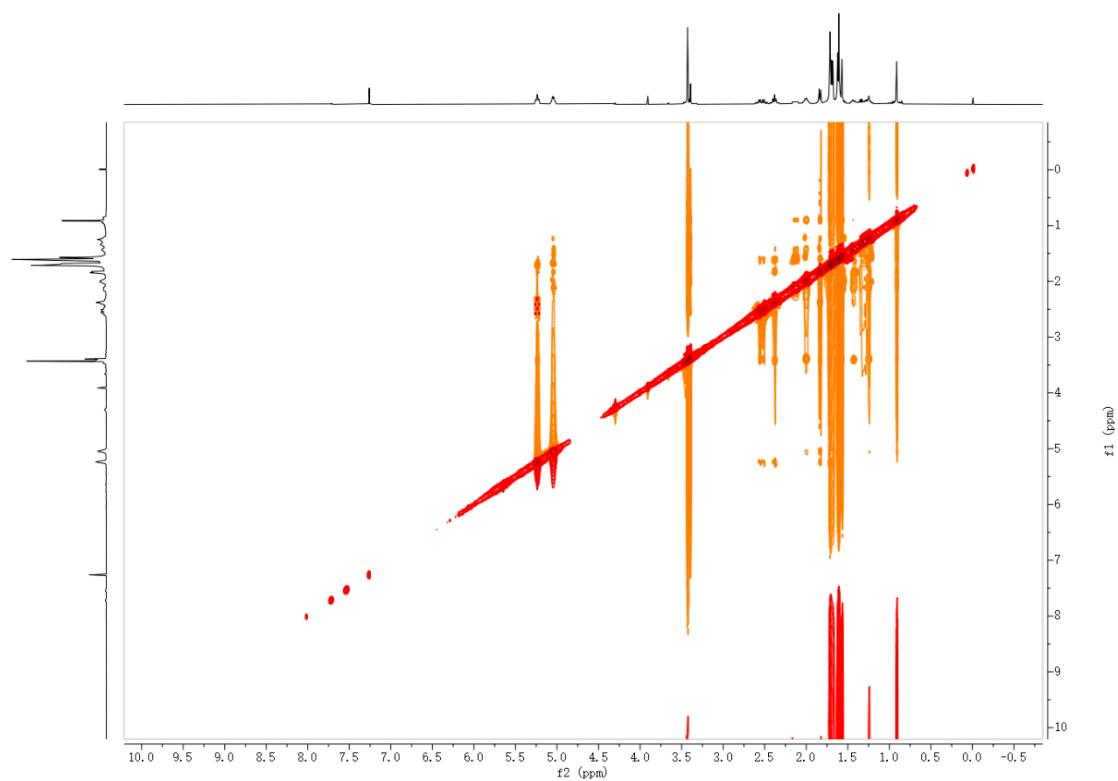

**Figure S8.** The HRESIMS spectrum of Hyperforatum A (**1**).

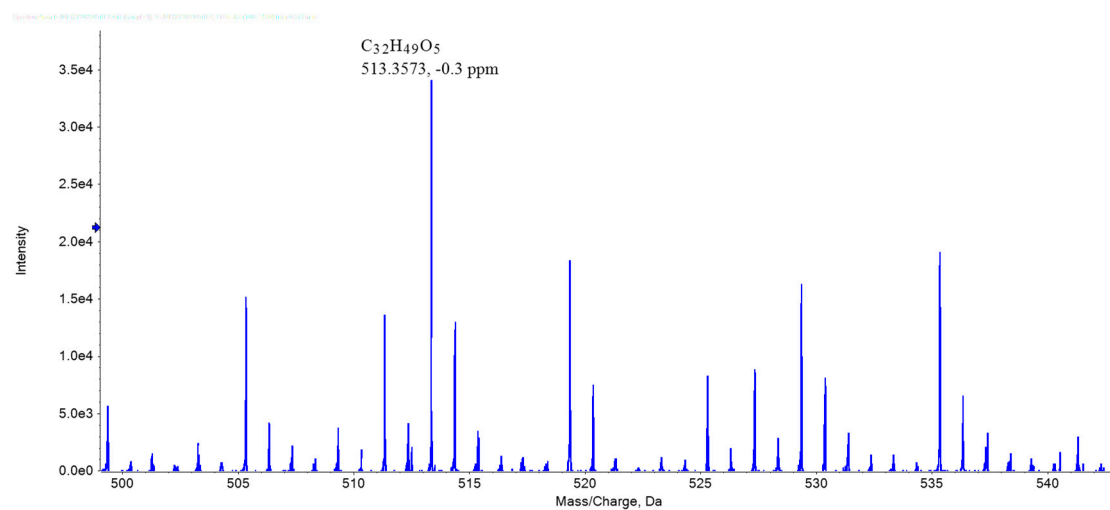

**Figure S9.** The UV spectrum of Hyperforatum A (**1**).

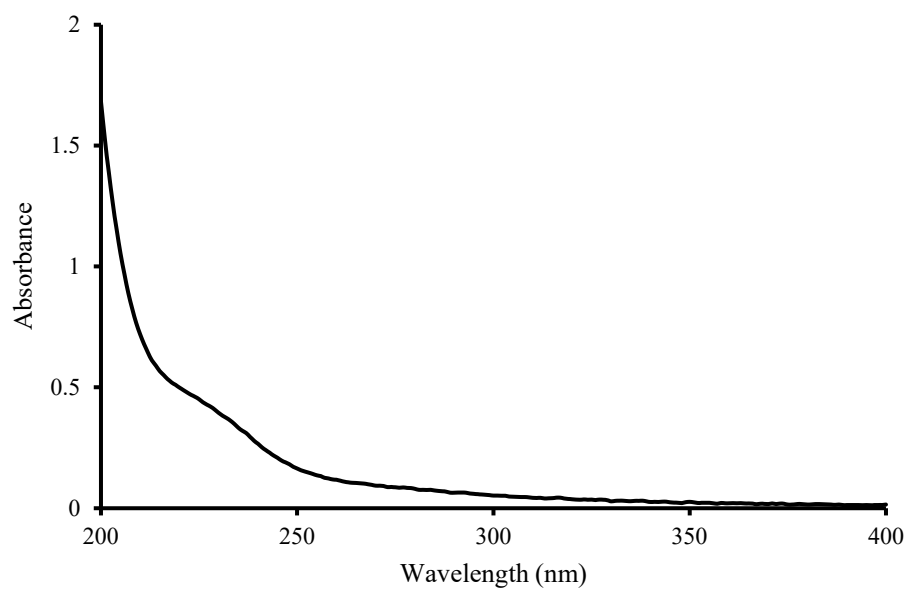

**Figure S10.** The Experimental ECD spectrum of Hyperforatum A (**1**).

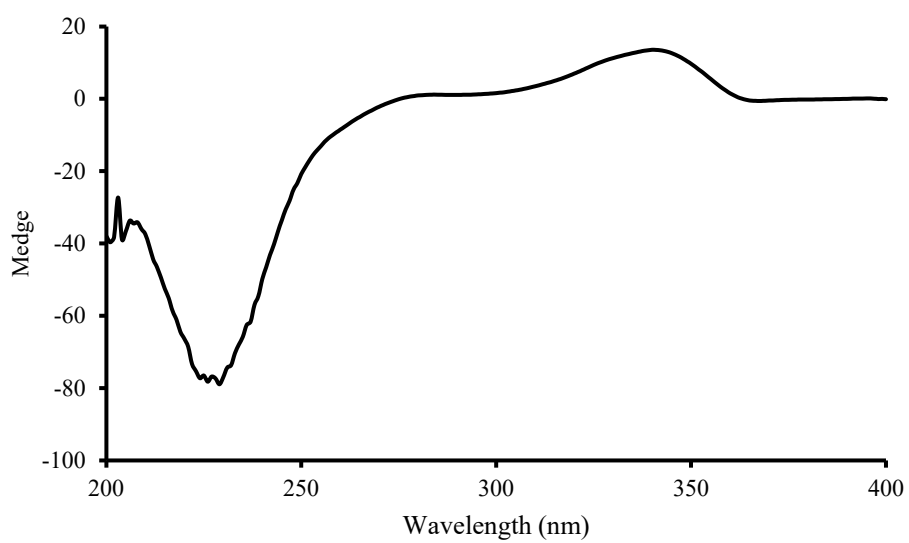

**Figure S11.** The  $^1\text{H}$  NMR spectrum of Hyperforatum B (**2**) in  $\text{CDCl}_3$  (400 MHz).

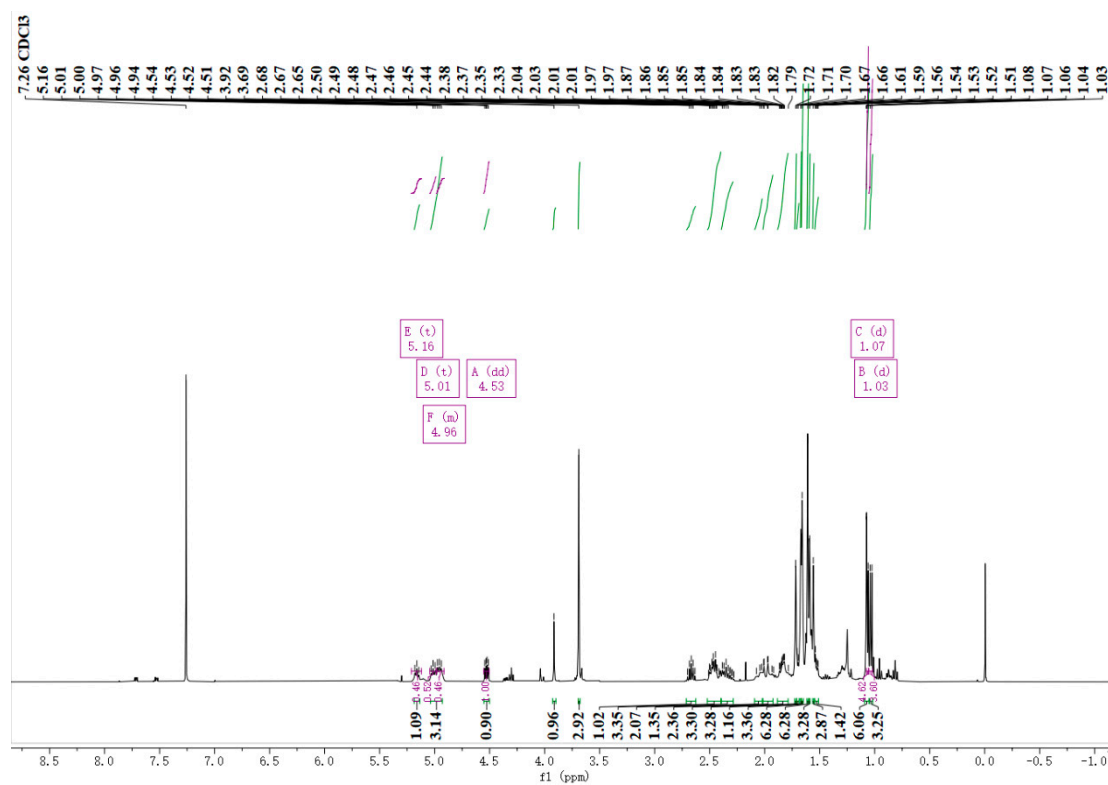

**Figure S12.** The  $^{13}\text{C}$  NMR spectrum of Hyperforatum B (**2**) in  $\text{CDCl}_3$  (100 MHz).

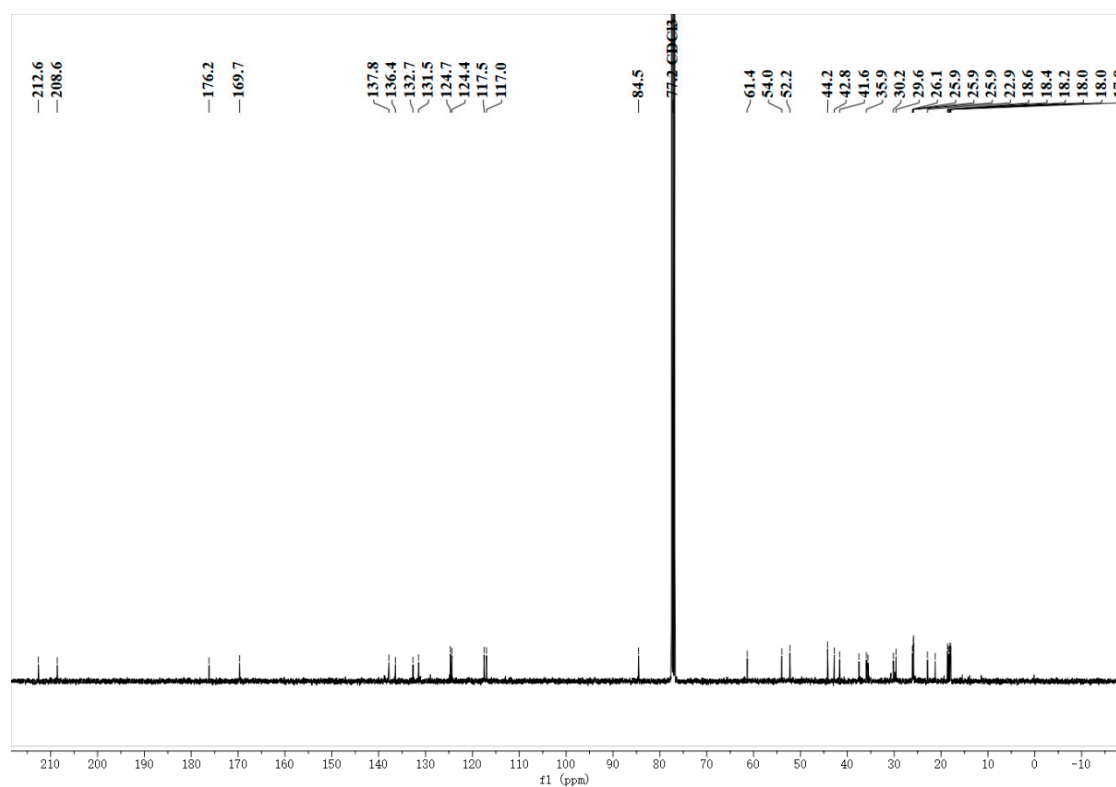

**Figure S13.** The DEPT 135° spectrum of Hyperforatum B (**2**) in CDCl<sub>3</sub>.

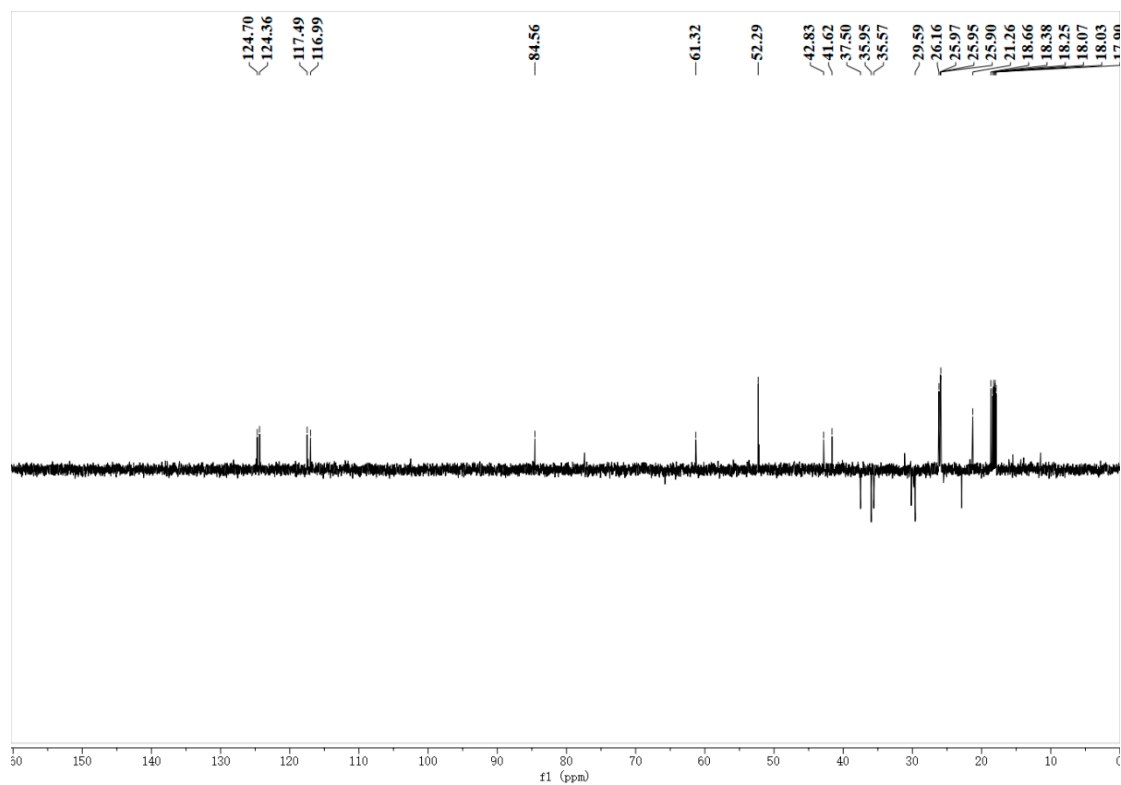

**Figure S14.** The <sup>1</sup>H-<sup>1</sup>H COSY spectrum of Hyperforatum B (**2**).

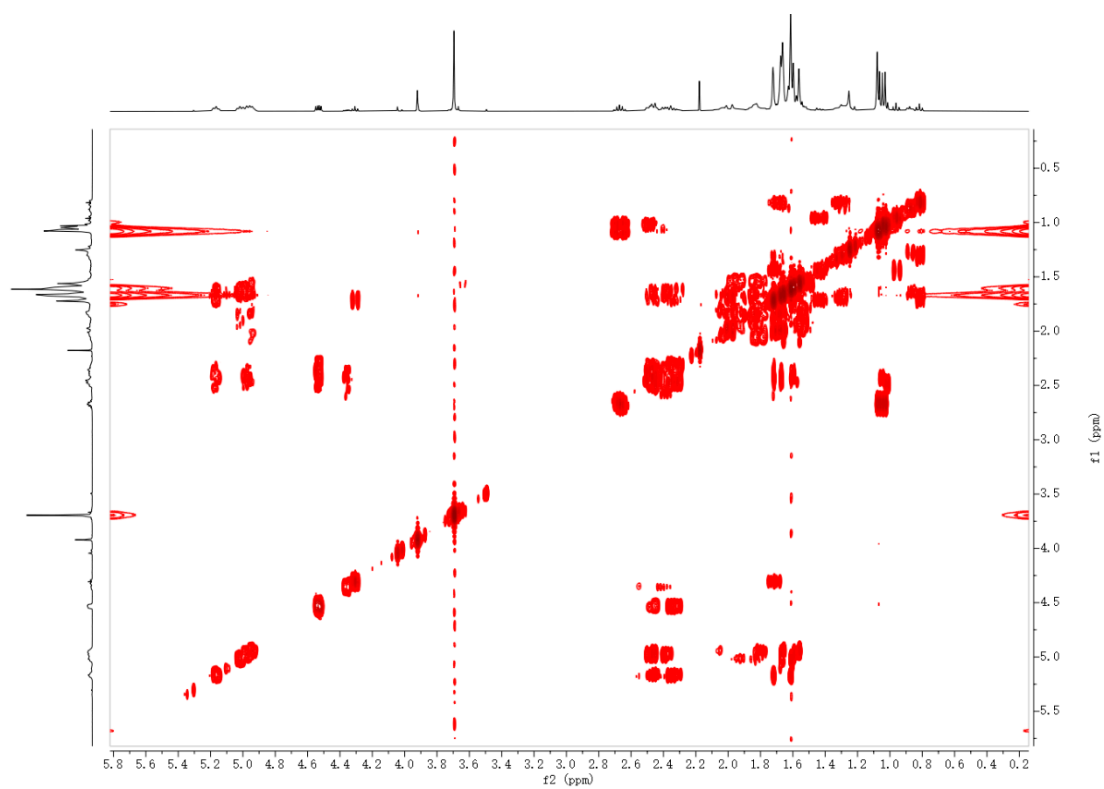

**Figure S15.** The HSQC spectrum of Hyperforatum B (2).

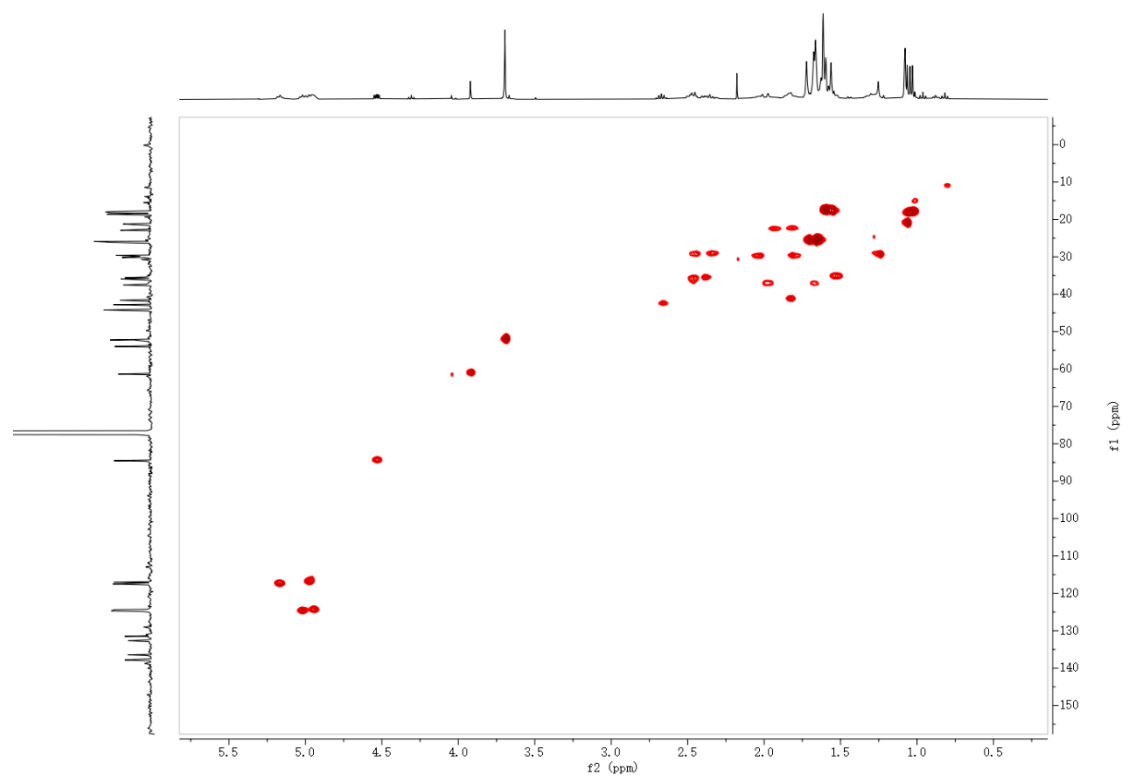

**Figure S16.** The HMBC spectrum of Hyperforatum B (2).

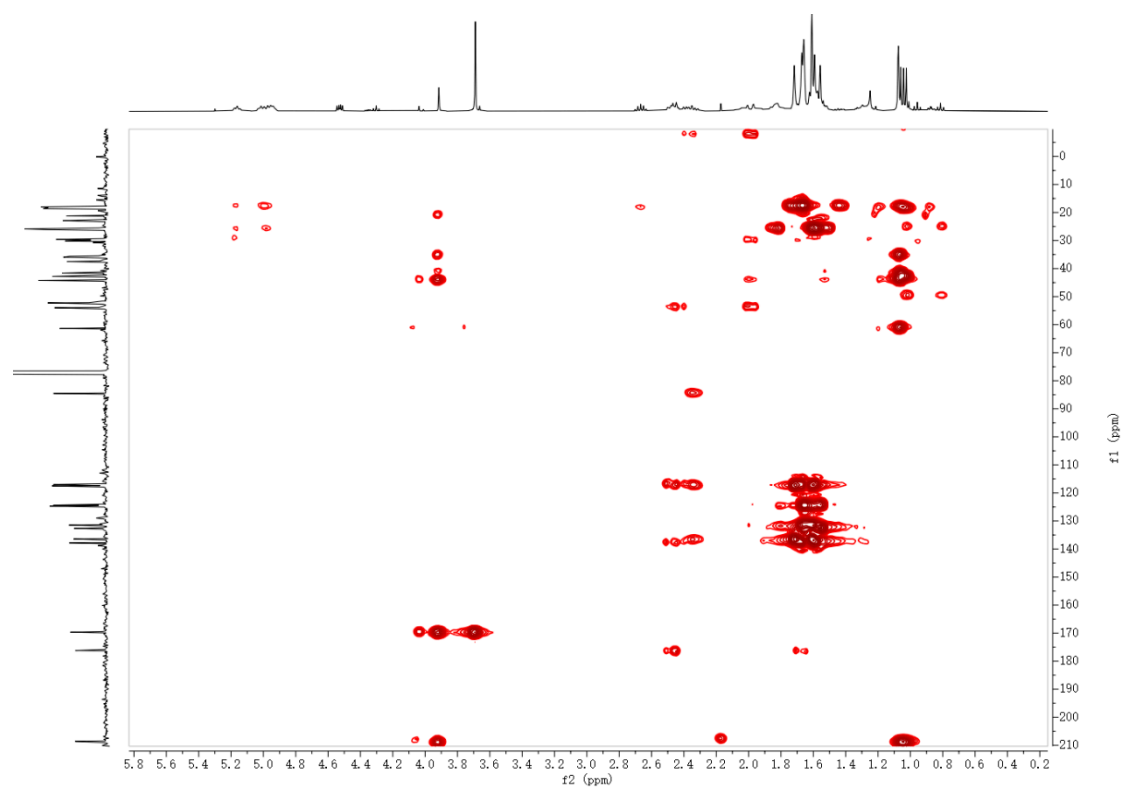

**Figure S17.** The NOESY spectrum of Hyperforatum B (2).

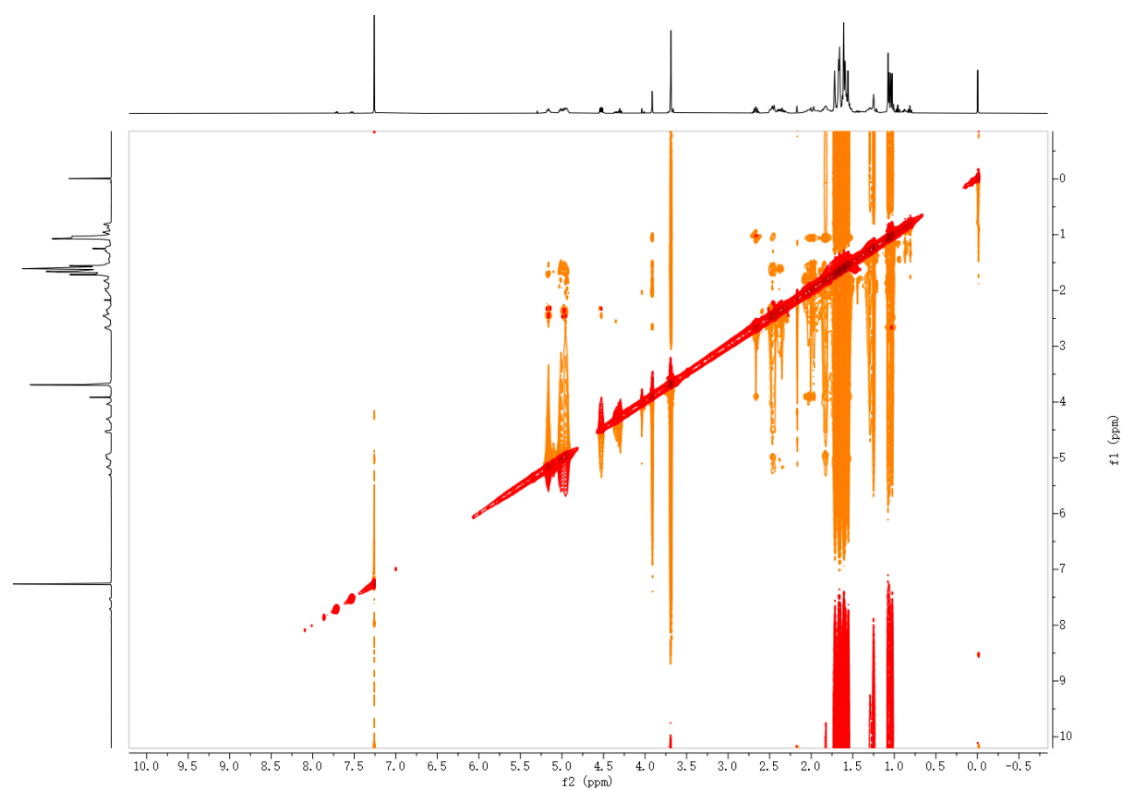

**Figure S18.** The HRESIMS spectrum of Hyperforatum B (2).

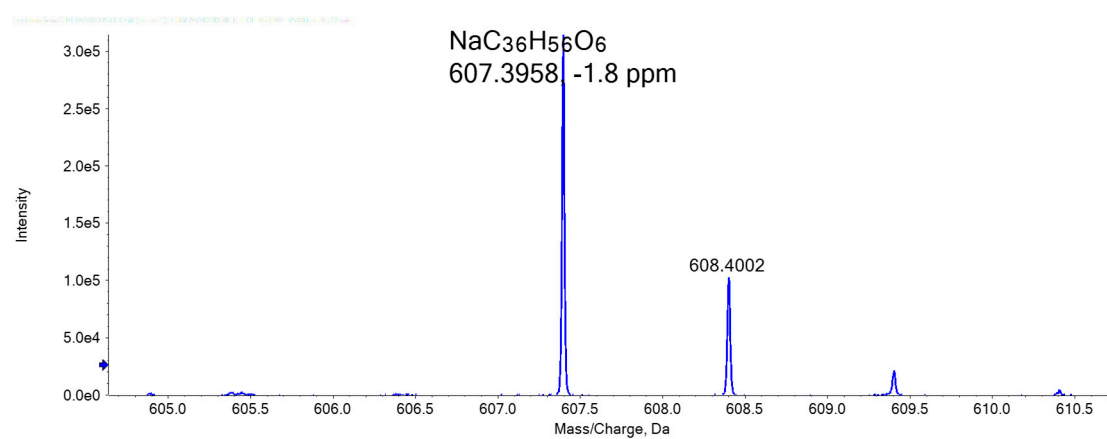

**Figure S19.** The UV spectrum of Hyperforatum B (2).

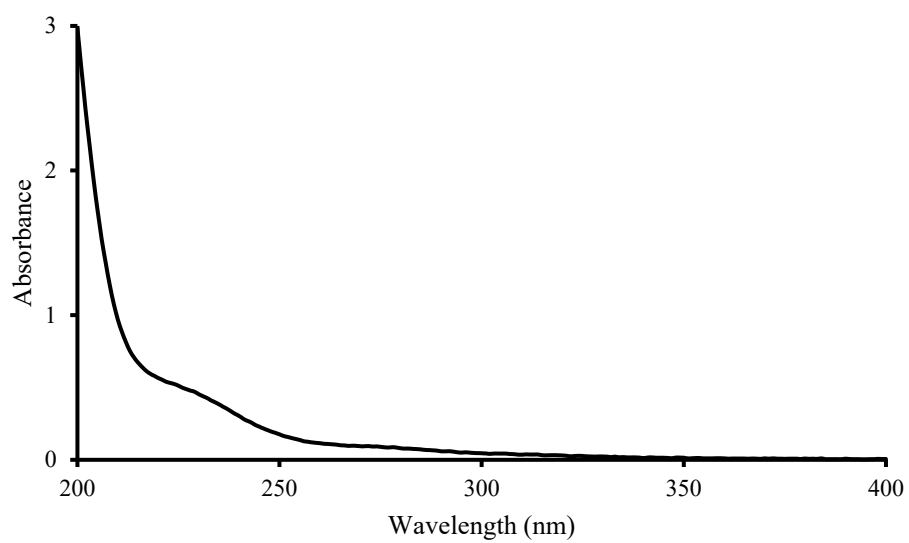

**Figure S20.** The Experimental ECD spectrum of Hyperforatum B (2).

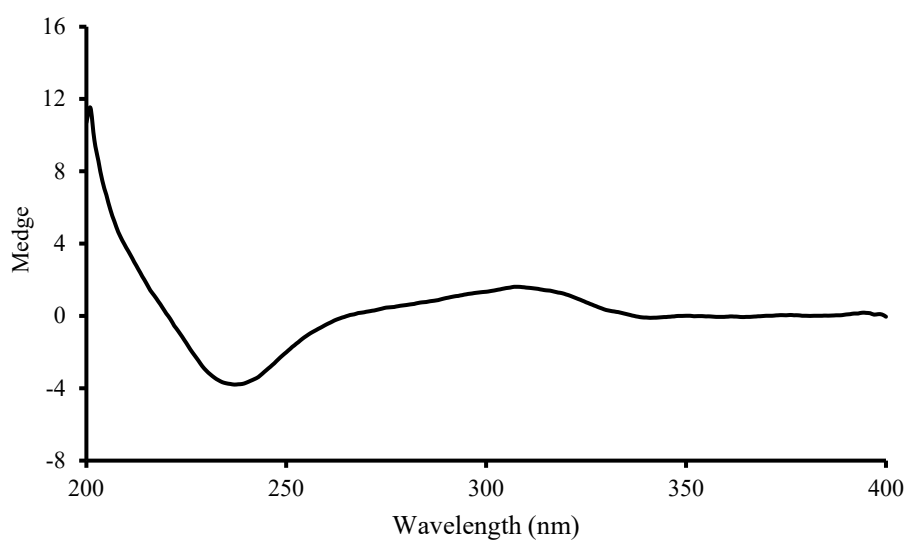

**Figure S21.** The  $^1\text{H}$  NMR spectrum of Hyperforatum C (**3**) in  $\text{CDCl}_3$  (400 MHz).

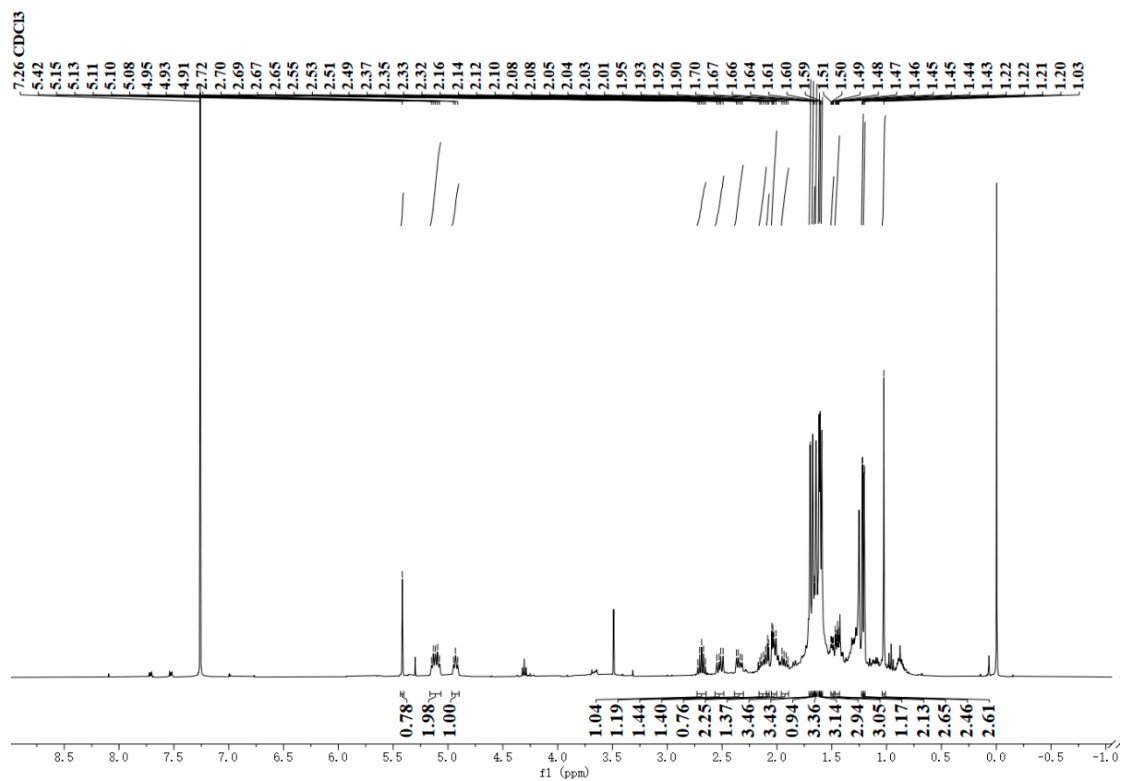

**Figure S22.** The  $^{13}\text{C}$  NMR spectrum of Hyperforatum C (**3**) in  $\text{CDCl}_3$  (100 MHz).

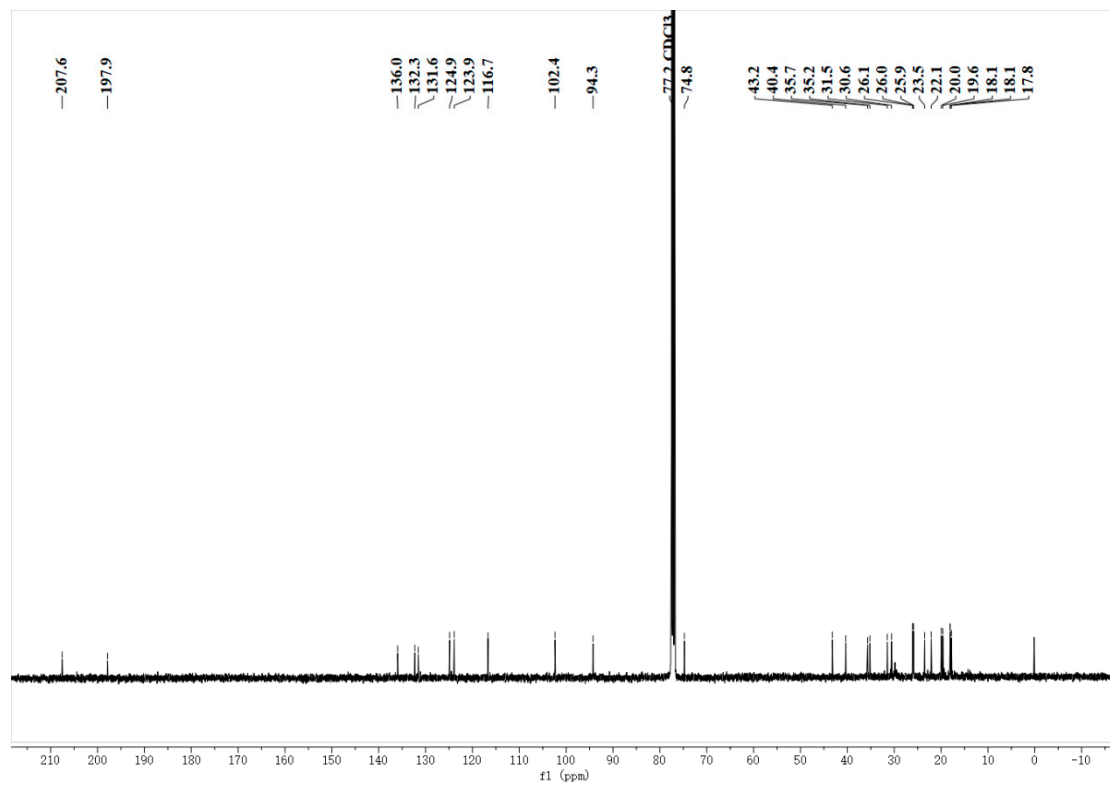

**Figure S23.** The DEPT 135° spectrum of Hyperforatum C (**3**) in CDCl<sub>3</sub>.

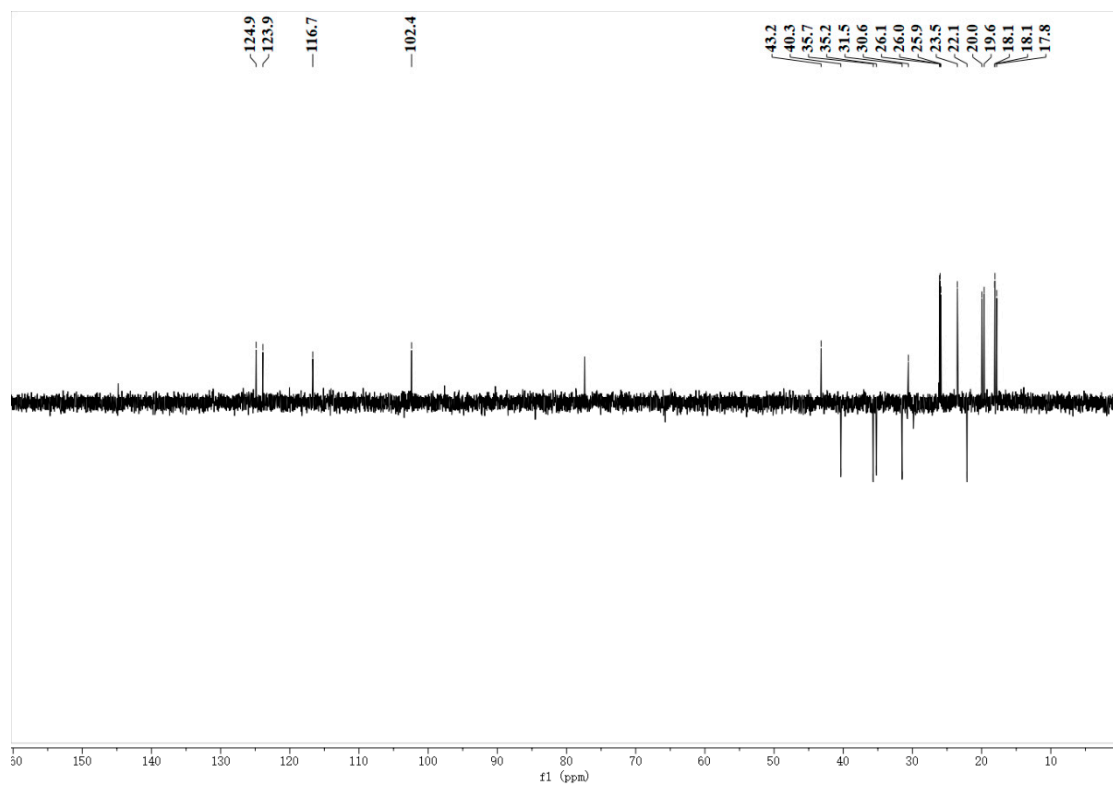

**Figure S24.** The <sup>1</sup>H-<sup>1</sup>H COSY spectrum of Hyperforatum C (**3**).

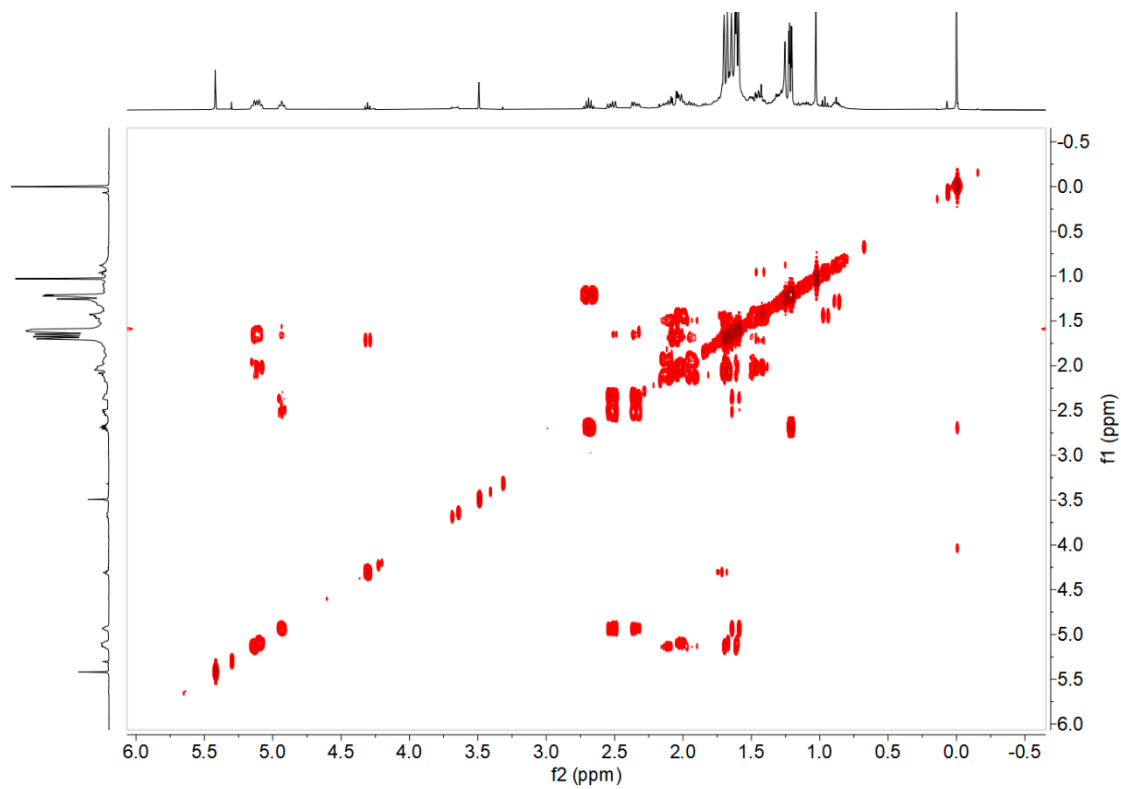

**Figure S25.** The HSQC spectrum of Hyperforatum C (3).

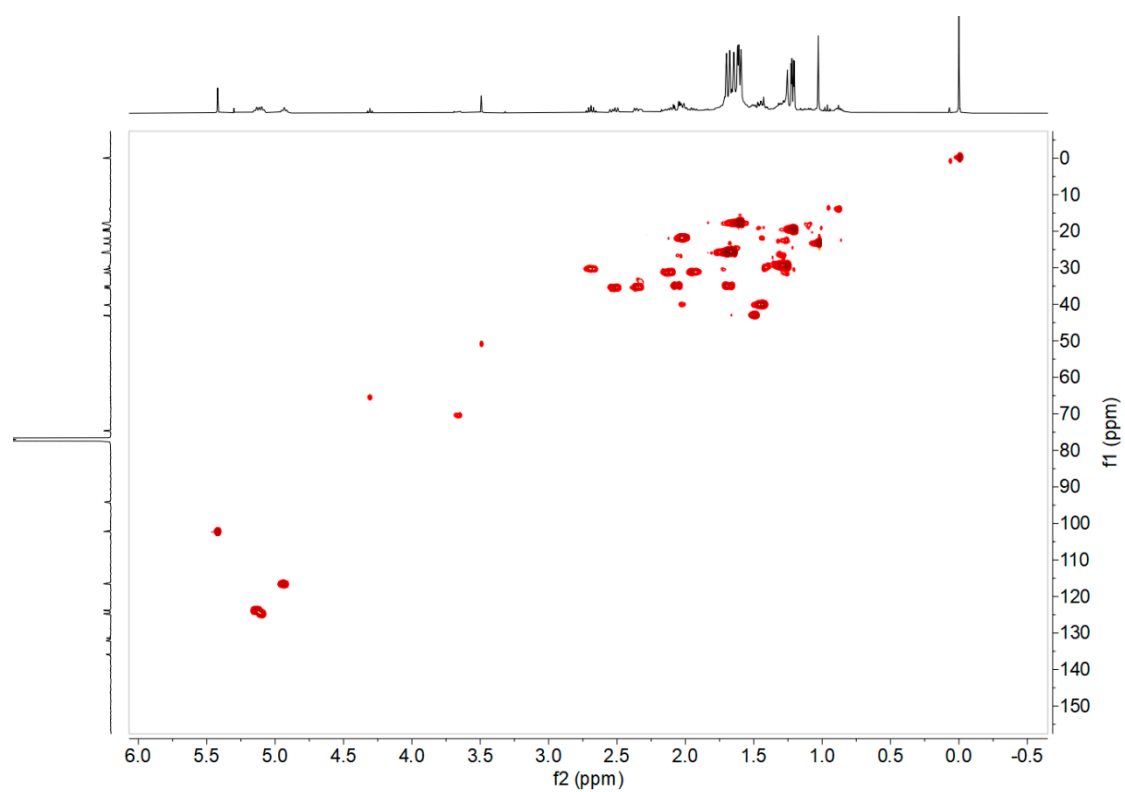

**Figure S26.** The HMBC spectrum of Hyperforatum C (3).

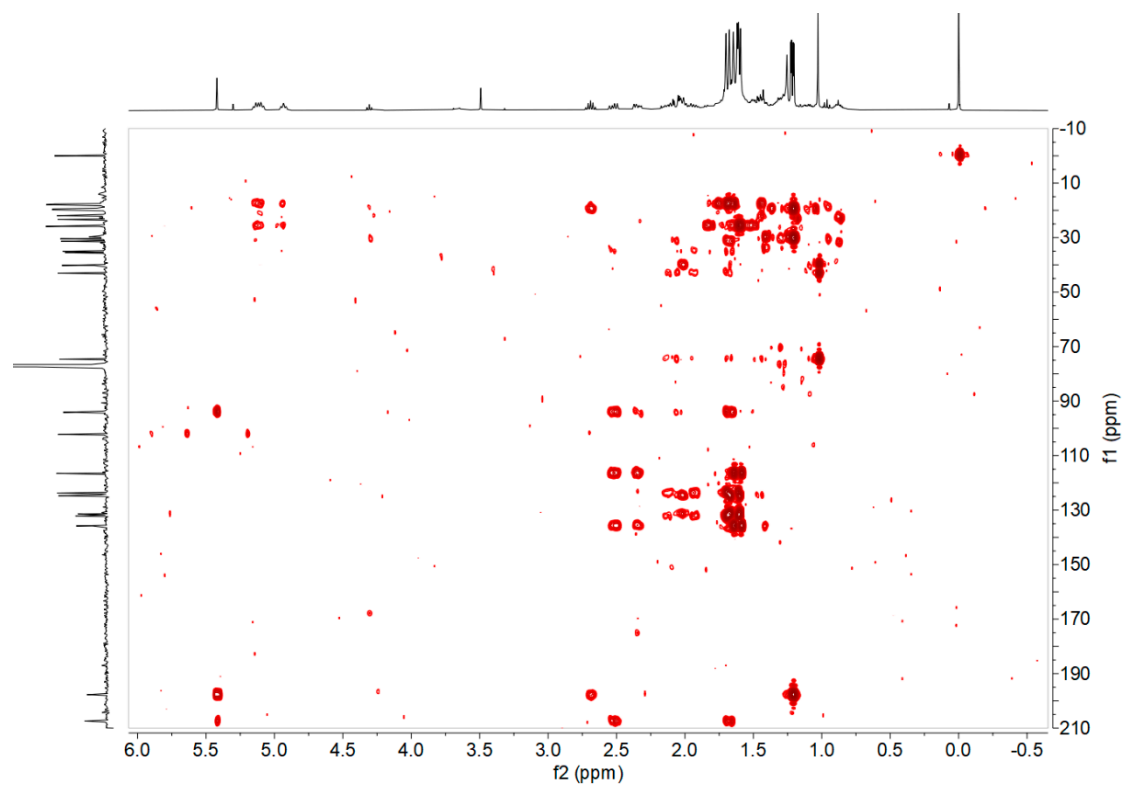

**Figure S27.** The NOESY spectrum of Hyperforatum C (3).

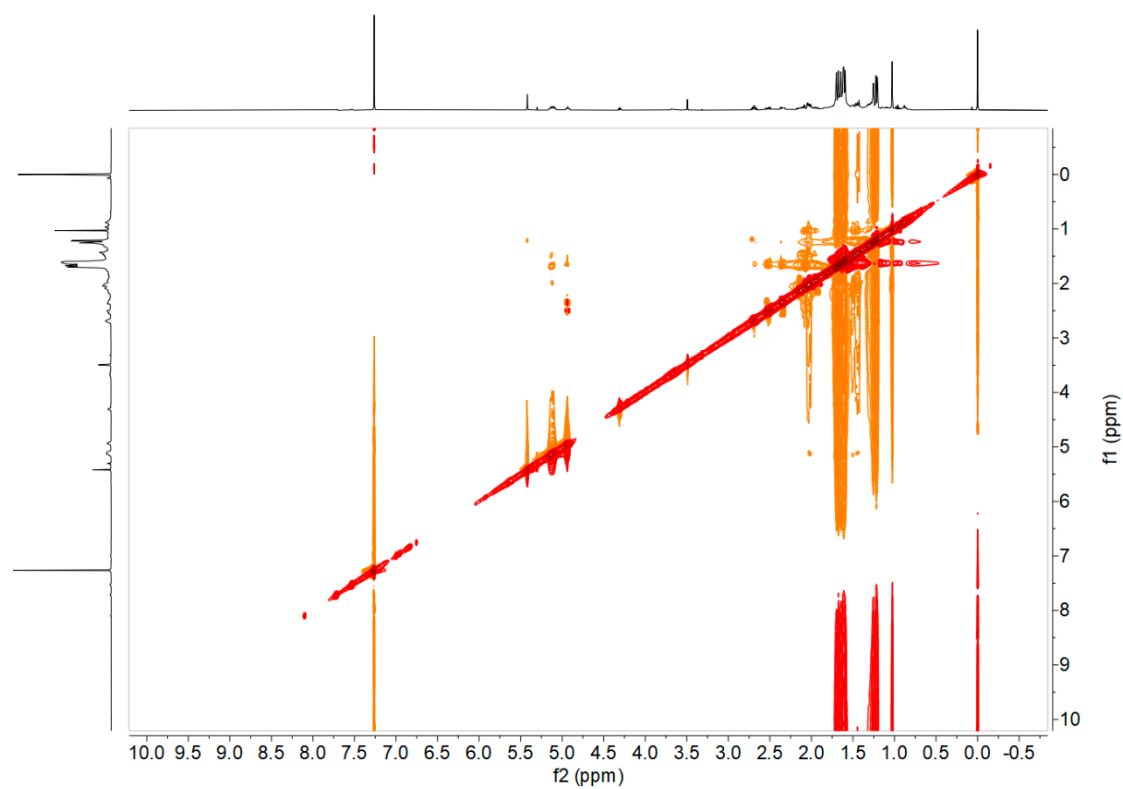

**Figure S28.** The HRESIMS spectrum of Hyperforatum C (3).

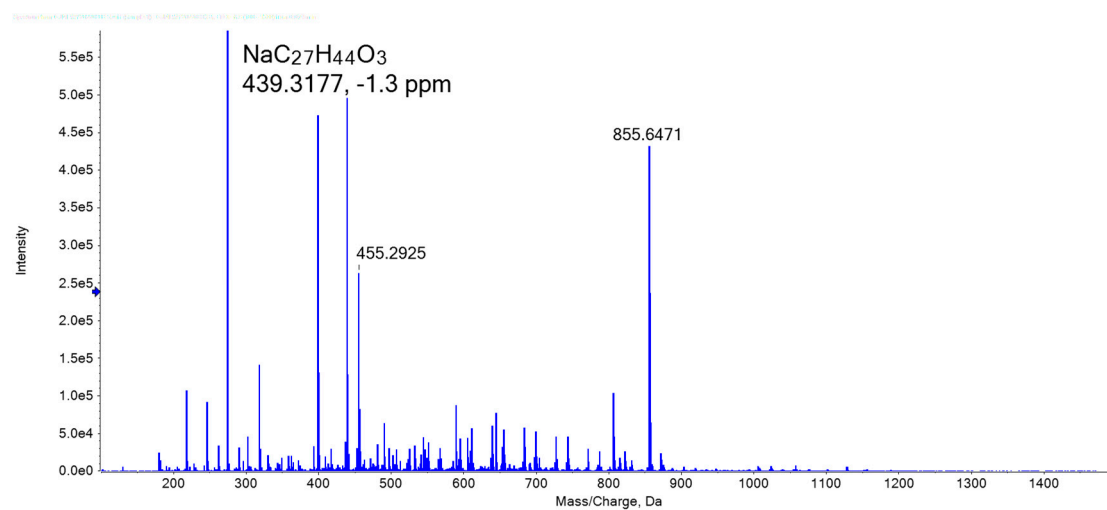

**Figure S29.** The UV spectrum of Hyperforatum C (**3**).

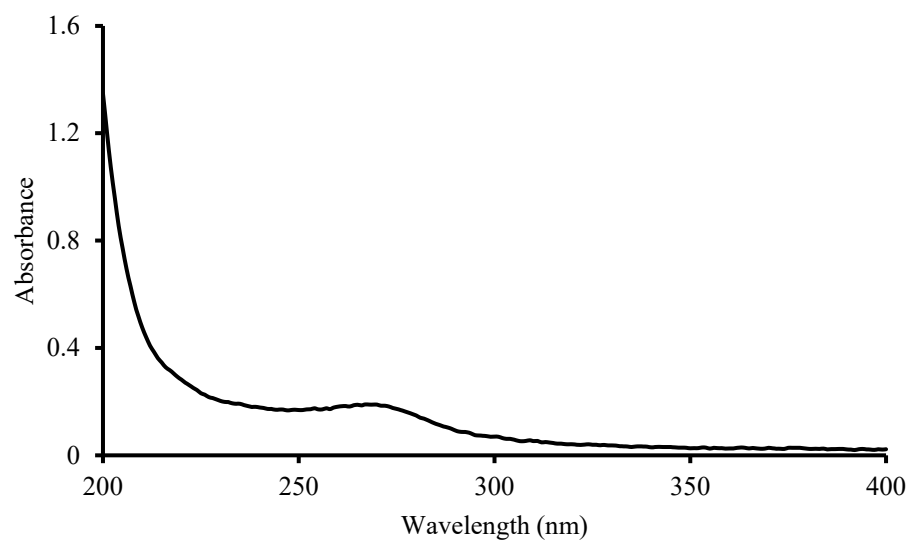

**Figure S30.** The Experimental ECD spectrum of Hyperforatum C (**3**).

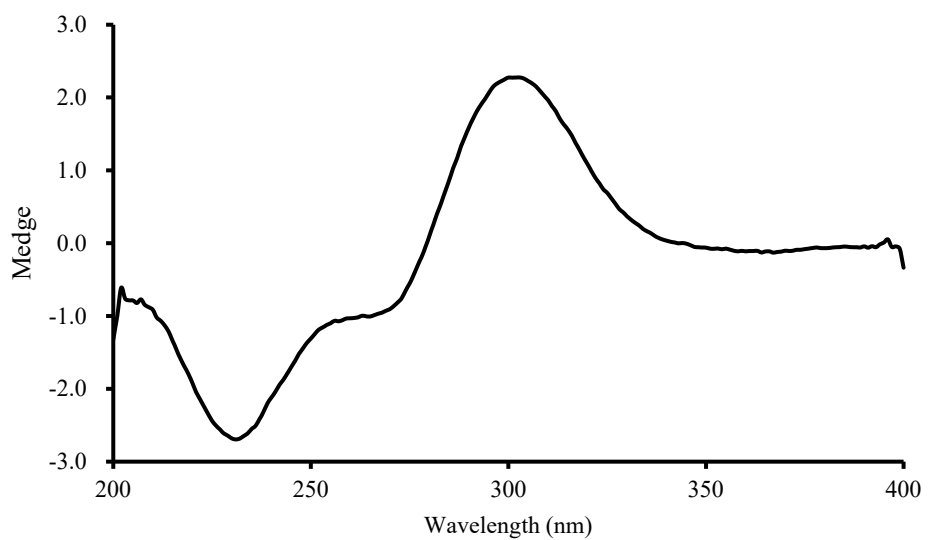

**Figure S31.** The  $^1\text{H}$  NMR spectrum of Hyperforatum D (**4**) in  $\text{CDCl}_3$  (800 MHz).

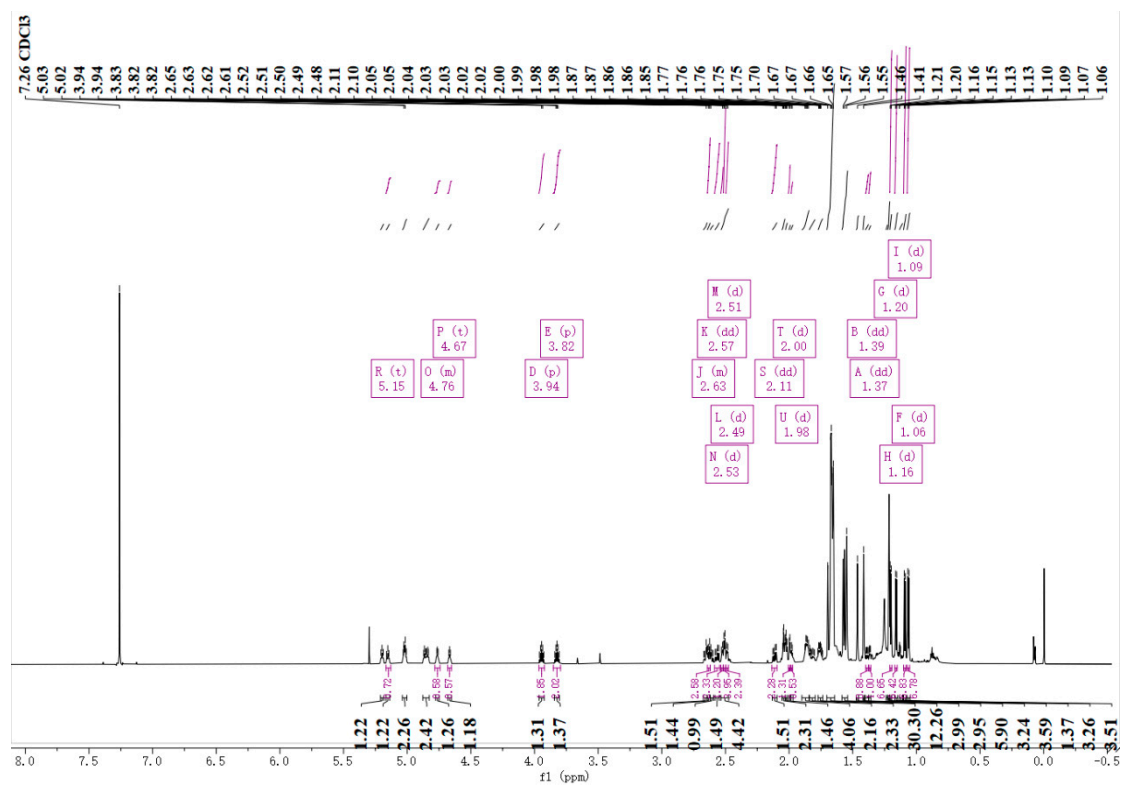

**Figure S32.** The  $^{13}\text{C}$  NMR spectrum of Hyperforatum D (**4**) in  $\text{CDCl}_3$  (200 MHz).

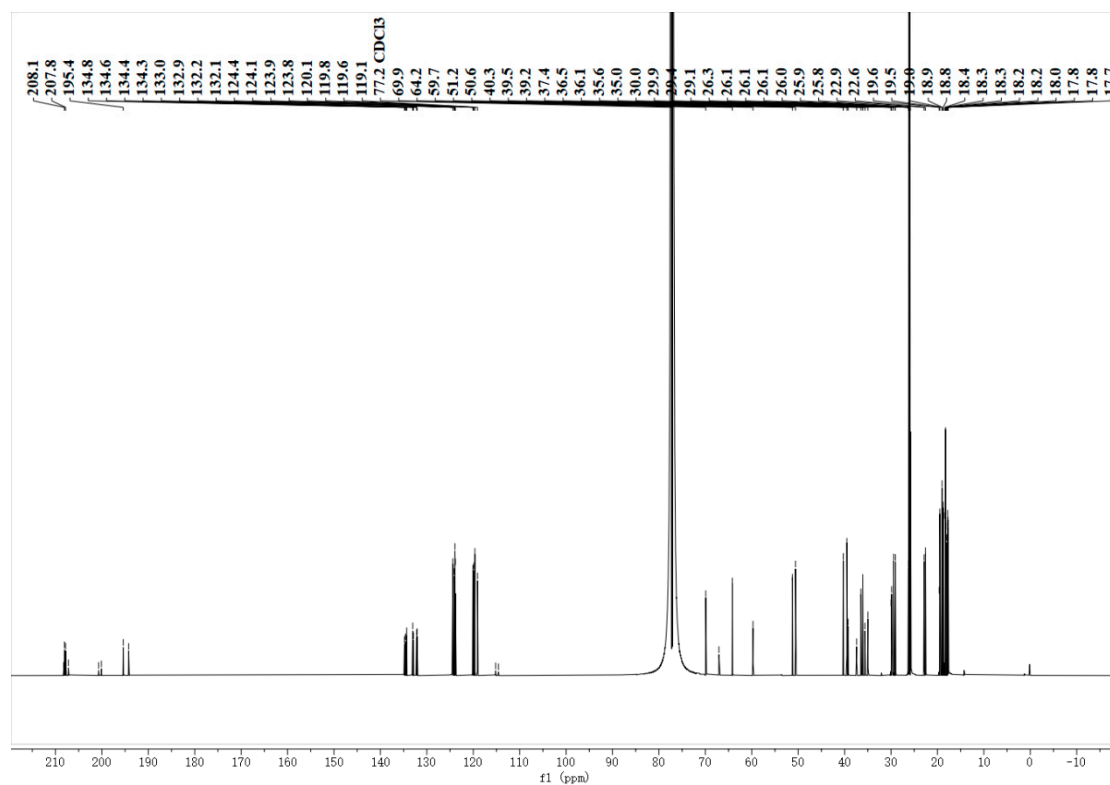

**Figure S33.** The DEPT 135° spectrum of Hyperforatum D (**4**) in CDCl<sub>3</sub>.

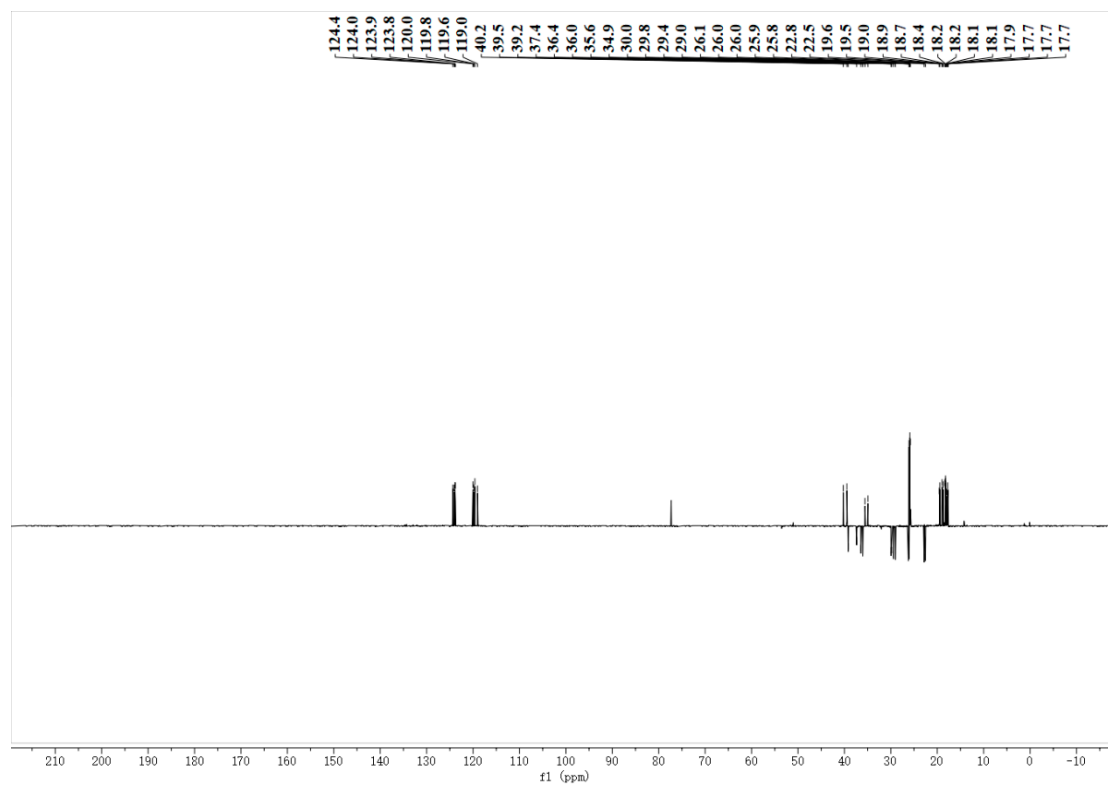

**Figure S34.** The <sup>1</sup>H-<sup>1</sup>H COSY spectrum of Hyperforatum D (**4**).

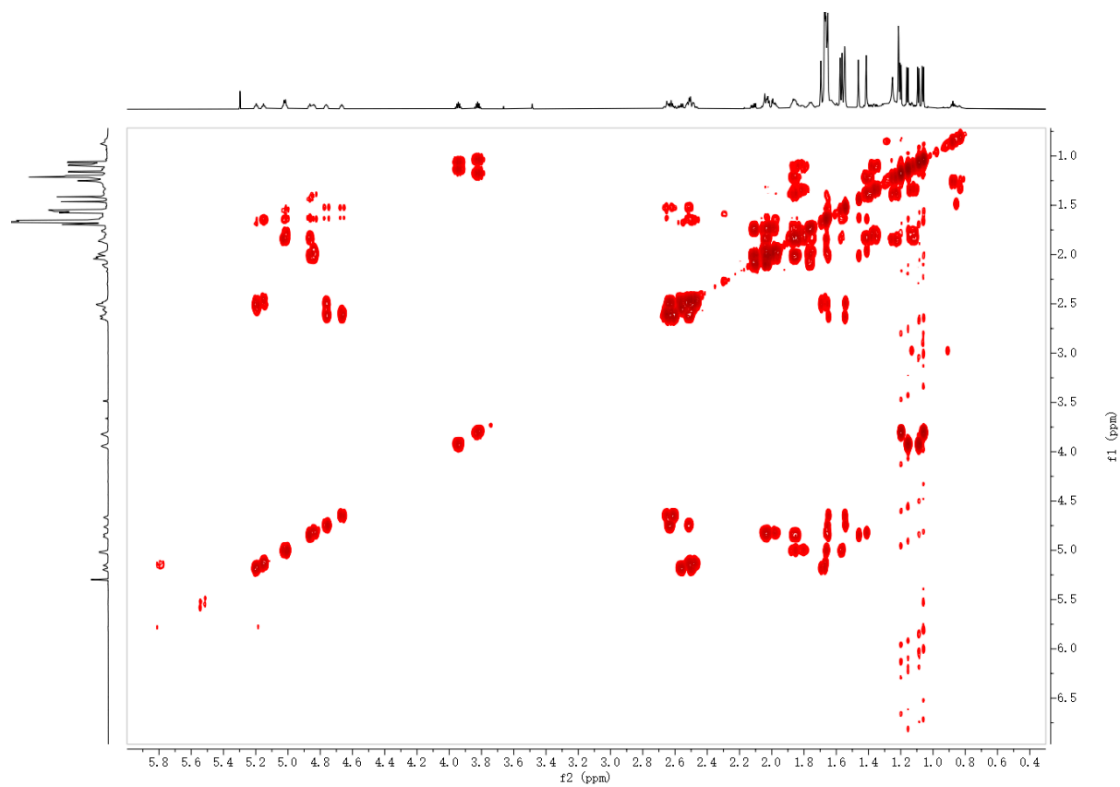

**Figure S35.** The HSQC spectrum of Hyperforatum D (**4**).

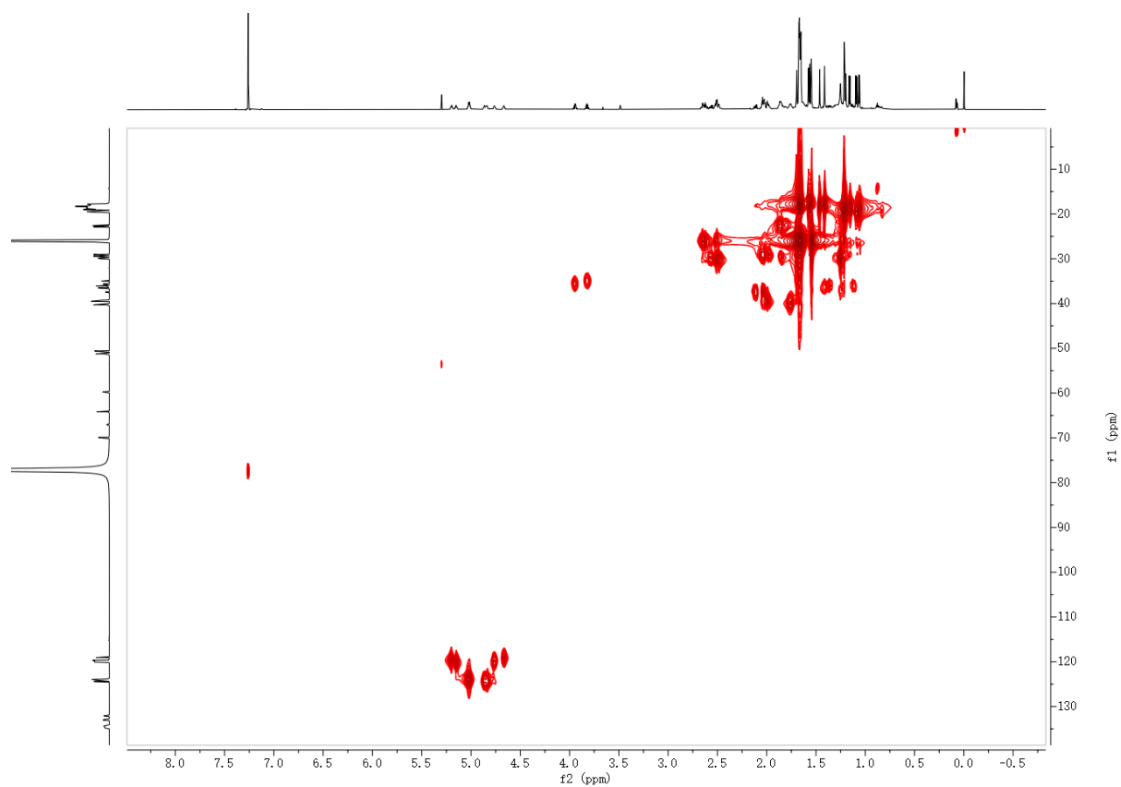

**Figure S36.** The HMBC spectrum of Hyperforatum D (**4**).

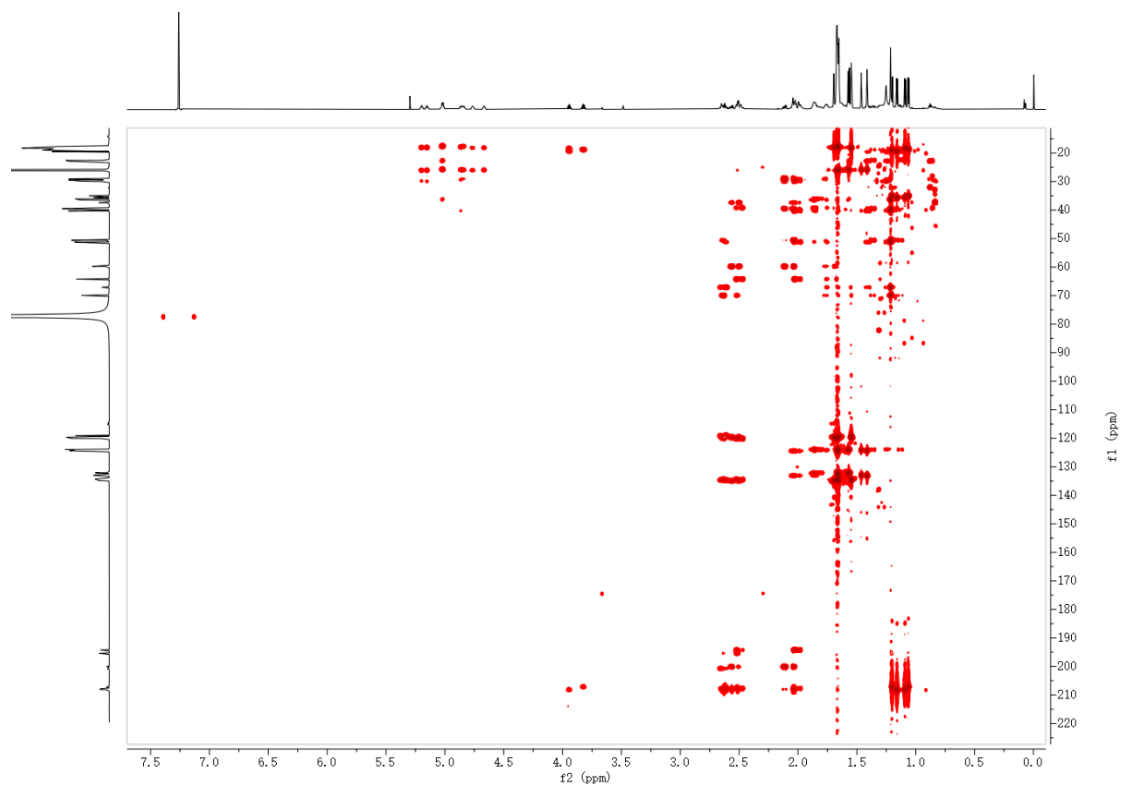

**Figure S37.** The NOESY spectrum of Hyperforatum D (4).

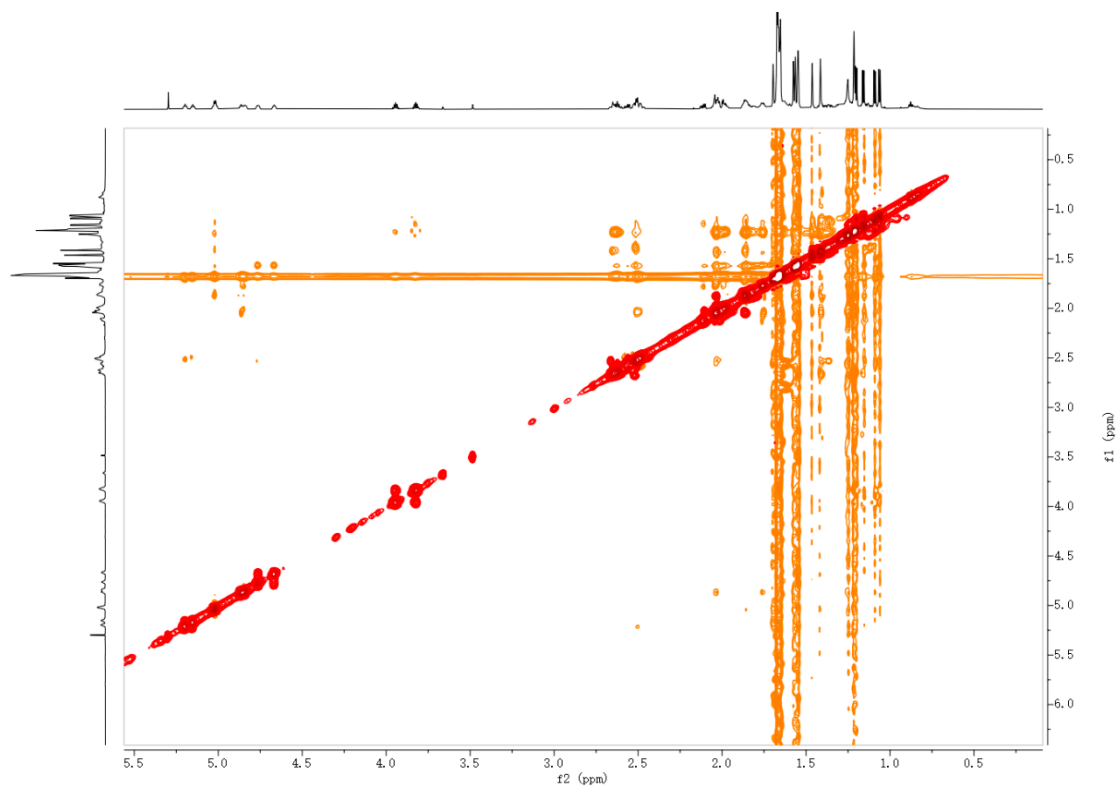

**Figure S38.** The HRESIMS spectrum of Hyperforatum D (4).

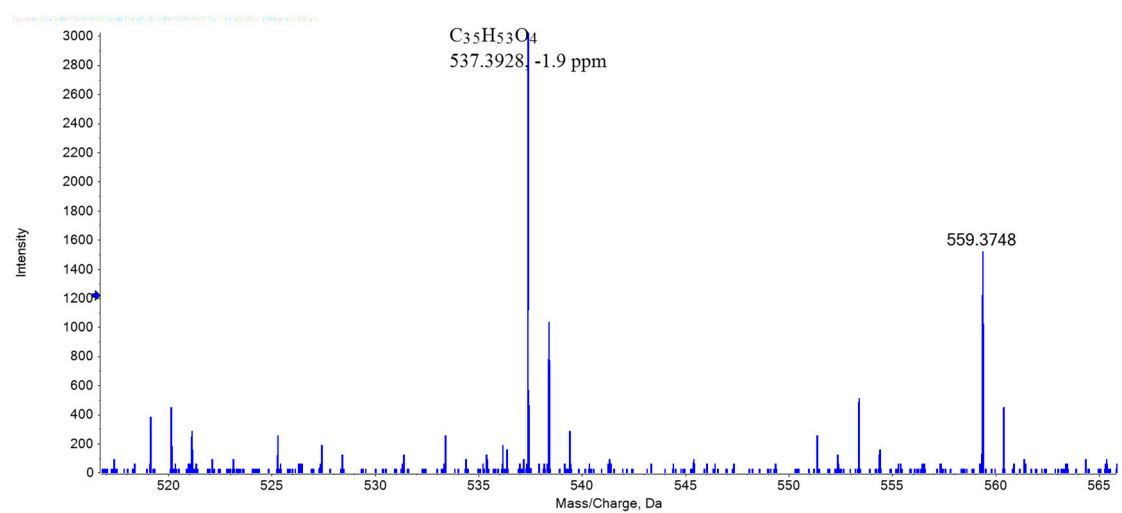

**Figure S39.** The UV spectrum of Hyperforatum D (4).

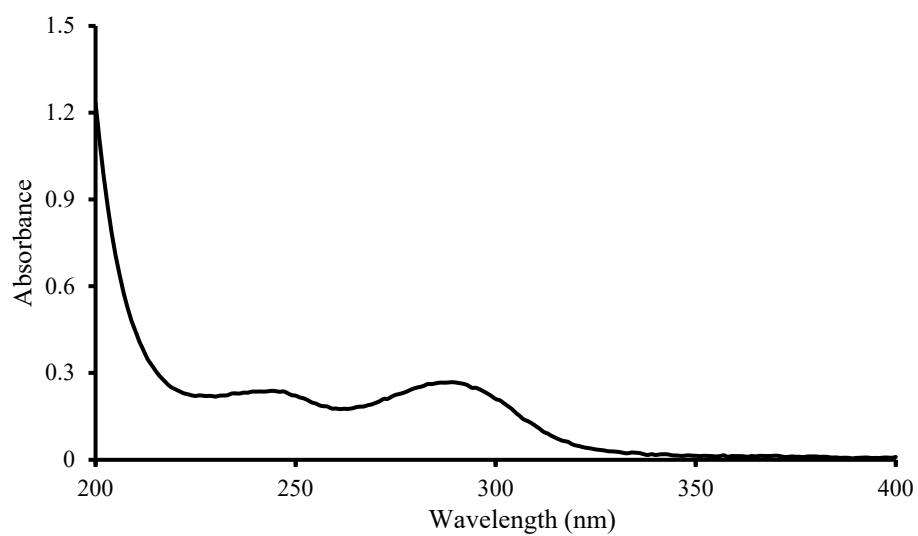

**Figure S40.** The Experimental ECD spectrum of Hyperforatum D (4).

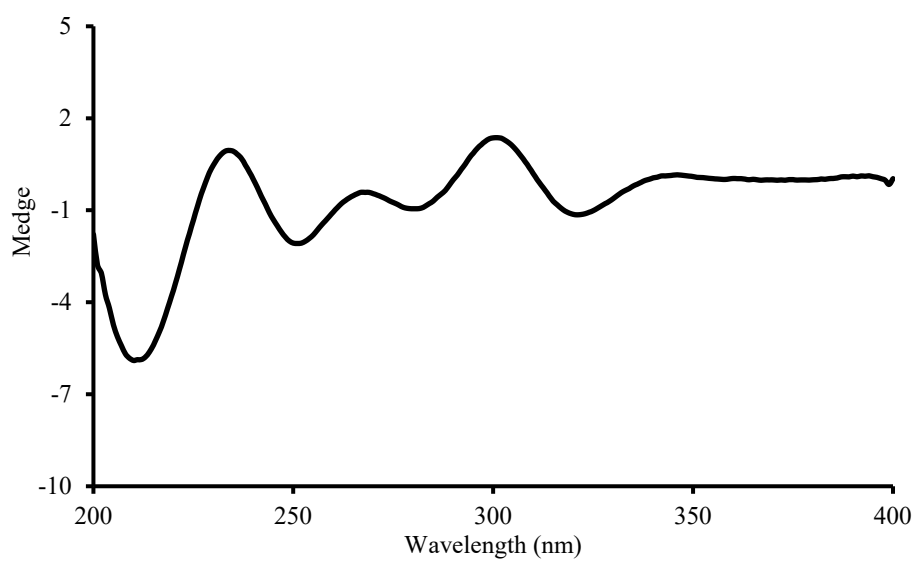

Supplement: s1 [file s1]
